# Supplementary material for: Drug Discovery Platform Targeting M. tuberculosis with Human Embryonic Stem Cell-Derived Macrophages
Source: PubMed Central journal article supplement — Stem Cell Reports. 2019 Oct 31;13(6):980–91. doi: 10.1016/j.stemcr.2019.10.002 (PMC6915848; doi:10.1016/j.stemcr.2019.10.002), 2019-10-31
Supplement: mmc4.pdf [file mmc4.pdf]

**Table S3** Anti-bacterial activity of WHO recommended drugs evaluated Mtb-infected iMAC based assay

| Group | Compound Name              | Host-cell based assay (iMAC) |                 |
|-------|----------------------------|------------------------------|-----------------|
|       |                            | %Inhibition                  | >50% inhibition |
| 1     | Isoniazid                  | 97.1                         | active          |
|       | Rifabutin                  | 117                          | active          |
|       | Rifampicin                 | 85.2                         | active          |
|       | Ethionamide                | 101.5                        | active          |
|       | Pyrazinamide               | 60                           | active          |
| 2     | Ofloxacin                  | 99.2                         | active          |
|       | Levofloxacin               | 109.9                        | active          |
|       | Gatifloxacin               | 108                          | active          |
|       | Moxifloxacin               | 104.9                        | active          |
| 3     | Streptomycin sulfate       | 27.6                         | -               |
|       | Amikacin                   | 106                          | active          |
| 4     | Ethambutol dihydrochloride | 76                           | active          |
|       | cycloserine                | 57.9                         | active          |
| 5     | Linezolid                  | 109.3                        | active          |
|       | Clofazimine                | 104.8                        | active          |
|       | Amoxicillin                | 62.1                         | active          |
|       | Clofazimine                | 104.8                        | active          |
|       | Imipenem                   | 37.4                         | -               |
|       | Clarithromycin             | 116                          | active          |

\* Foot note: Groups indicated: 1) First-line oral anti-TB drugs. 2) Fluoroquinolones. 3) Injectable anti-TB drug (injectable or parenteral agents).

4) Oral bacteriostatic second line anti-TB. 5) Anti-TB drugs with limited data on efficacy and/or long-term safety in the treatment of drug-resistant TB
