# Supplementary material for: Drug Discovery Platform Targeting M. tuberculosis with Human Embryonic Stem Cell-Derived Macrophages
Source: PubMed Central journal article supplement — Stem Cell Reports. 2019 Oct 31;13(6):980–91. doi: 10.1016/j.stemcr.2019.10.002 (PMC6915848; doi:10.1016/j.stemcr.2019.10.002), 2019-10-31
Supplement: mmc5.pdf [file mmc5.pdf]

**Table S4** Data on drug-resistant strains for extracellular activity of 10-DEBC

| Strain  | Catalog No  | Type | Resistance                                                                                                                                                                   |
|---------|-------------|------|------------------------------------------------------------------------------------------------------------------------------------------------------------------------------|
| 116-47  | 00116-00047 | MDR  | Isoniazid, rifampicin, streptomycin, ethambutol, pyrazinamide                                                                                                                |
| 203-60  | 00203-00060 | XDR  | Isoniazid, rifampicin, ofloxacin, moxifloxacin, levofloxacin, streptomycin, kanamycin, capreomycin, amikacin, ethambutol, prothionamide, p-aminosalicylic acid, pyrazinamide |
| 203-101 | 00203-00101 | XDR  |                                                                                                                                                                              |
