# Supplementary material for: Drug Discovery Platform Targeting M. tuberculosis with Human Embryonic Stem Cell-Derived Macrophages
Source: PubMed Central journal article supplement — Stem Cell Reports. 2019 Oct 31;13(6):980–91. doi: 10.1016/j.stemcr.2019.10.002 (PMC6915848; doi:10.1016/j.stemcr.2019.10.002), 2019-10-31
Supplement: mmc6.pdf [file mmc6.pdf]

**Table S5** Material information used in the experiments

| Antibody                       | Supplier       | Cat. no.   |
|--------------------------------|----------------|------------|
| CD11b-PE(clone D12)            | BD Biosciences | 333142     |
| CD45-BB515(clone HI30)         | BD Biosciences | 564585     |
| CD45-APC (clone 2D1)           | eBioscience    | 17-9459-42 |
| CD43-BV421 (clone 1G1D)        | BD Biosciences | 562916     |
| CD14-BV421 (clone M $\phi$ P9) | BD Biosciences | 563743     |
| CD34-BV605(clone 581)          | BioLegend      | 343529     |
| CD86-BV650 (clone IT2.2)       | BioLegend      | 305428     |
| HLA-DR-BV711 (clone G46-6)     | BD Biosciences | 563696     |
| CD16-PE (clone 3GB)            | BD Biosciences | 555407     |

| Cytokine | Final Conc.     | Supplier   | Cat. no. |
|----------|-----------------|------------|----------|
| BMP-4    | 20 or 100 ng/ml | R&D System | 314-BP   |
| VEGF     | 40 ng/ml        | R&D System | 293-VE   |
| SCF      | 50 ng/ml        | R&D System | 255-SC   |
| TPO      | 10 ng/ml        | R&D System | 288-TPN  |
| IL-3     | 50 ng/ml        | Peprotech  | 200-03   |
| IL-6     | 50 ng/ml        | Peprotech  | 200-06   |
| Flt-3L   | 50 ng/ml        | R&D System | 308-FK   |
| M-CSF    | 100 ng/ml       | Peprotech  | 300-25   |
